# Supplementary material for: Effects of Temperature on the Developmental and Reproductive Biology of North American Bean Thrips, Caliothrips fasciatus (Pergande) (Thysanoptera: Thripidae: Panchaetothripinae)
Source: MDPI journal article supplement (doi:10.3390/insects14070641), 2023-07-15
Supplement: s1 [file s1]

**Table S1.** Estimated parameters and  $R^2_{\text{adj}}$  values of the linear model for describing the relationship between development rate ( $D_r$ ) and temperature for immature stages (larvae and pupae) of *Caliothrips fasciatus* (male and female data combined) under constant (data are from Bailey [1933]) and fluctuating temperature (this study) profiles.

| Model           | Model Equation | Parameter          | Parameter Estimate       |                        | Reference              |
|-----------------|----------------|--------------------|--------------------------|------------------------|------------------------|
|                 |                |                    | Fluctuating (This study) | Constant (Bailey 1933) |                        |
| Ordinary Linear | $D_r = a + bT$ | $a$                | -0.0321                  | -0.0583                | Campbell et al. (1974) |
|                 |                | $b$                | 0.0051                   | 0.0048                 |                        |
|                 |                | $K$ (degree-days)  | 196.08                   | 208.33                 |                        |
|                 |                | $T_{\text{min}}$   | 6.29                     | 12.15                  |                        |
|                 |                | $R^2_{\text{adj}}$ | 0.9821                   | 0.9784                 |                        |

See corresponding reference for full description of model parameters

For both datasets, temperatures at which development rate of *C. fasciatus* larvae and pupae deviated from rectilinearity were omitted from analyses (i.e., development rate at 20 and 37 °C in this study; all temperature dependent data from Bailey’s [1933] study aligned with the linear portion of the dataset).
